# Supplementary material for: Questionnaires Assessing Adolescents’ Self-Concept, Self-Perception, Physical Activity and Lifestyle: A Systematic Review
Source: MDPI journal article supplement (doi:10.3390/children9010091), 2022-01-10
Supplement: s1 [file s1]

**Table S2.** Assessment of the Cosmin [25] instruments.

|                                                                                                                                   | Self-esteem/self-concept |                                               |                  |                                                       | Self-perception      |                                              |                              |                      |                  | Physical exercise   |                                       |                   |                    |                    | Lifestyle          |                                           |                            |                                  |                     |                |                |
|-----------------------------------------------------------------------------------------------------------------------------------|--------------------------|-----------------------------------------------|------------------|-------------------------------------------------------|----------------------|----------------------------------------------|------------------------------|----------------------|------------------|---------------------|---------------------------------------|-------------------|--------------------|--------------------|--------------------|-------------------------------------------|----------------------------|----------------------------------|---------------------|----------------|----------------|
|                                                                                                                                   | RSES <sup>26</sup>       | Self-Esteem Inventory for Adults <sup>6</sup> | ACS <sup>3</sup> | Self-Perception Profile for Adolescents <sup>10</sup> | GHQ-12 <sup>39</sup> | Piers-Harris Self-Concept Scale <sup>9</sup> | Beck Inventory <sup>51</sup> | SOC 13 <sup>38</sup> | BSQ <sup>2</sup> | PAQ-A <sup>55</sup> | Self-Perception Profile <sup>16</sup> | CAF <sup>56</sup> | MIFA <sup>15</sup> | CAPA <sup>17</sup> | HBSC <sup>58</sup> | Satisfaction with Life Scale <sup>3</sup> | Kidscreen 52 <sup>60</sup> | MeDi et PRE DIM ED <sup>62</sup> | Kidmed <sup>5</sup> | HPLP II (1996) | HPLP II (1987) |
| 1. Formulate the objective of the review.                                                                                         | Yes                      | Yes                                           | Yes              | Yes                                                   | Yes                  | Yes                                          | Yes                          | Yes                  | Yes              | Yes                 | Yes                                   | Yes               | Yes                | Yes                | Yes                | Yes                                       | Yes                        | Yes                              | Yes                 | Yes            | Yes            |
| 2. Formulate the eligibility criteria.                                                                                            | Yes                      | Yes                                           | Yes              | Yes                                                   | Yes                  | Yes                                          | Yes                          | Yes                  | Yes              | Yes                 | Yes                                   | Yes               | Yes                | Yes                | Yes                | Yes                                       | Yes                        | Yes                              | Yes                 | Yes            | Yes            |
| 3. Conduct a bibliographic search.                                                                                                | Yes                      | Yes                                           | Yes              | Yes                                                   | Yes                  | Yes                                          | Yes                          | Yes                  | Yes              | Yes                 | Yes                                   | Yes               | Yes                | Yes                | Yes                | Yes                                       | Yes                        | Yes                              | Yes                 | Yes            | Yes            |
| 4. Select abstracts and full-text articles.                                                                                       | Yes                      | Yes                                           | Yes              | Yes                                                   | Yes                  | Yes                                          | Yes                          | Yes                  | Yes              | Yes                 | Yes                                   | Yes               | Yes                | Yes                | Yes                | Yes                                       | Yes                        | Yes                              | Yes                 | Yes            | Yes            |
| 5. Extract data on the characteristics of the measuring instruments included and information on feasibility and interpretability. | Yes                      | Yes                                           | Yes              | Yes                                                   | Yes                  | Yes                                          | Yes                          | Yes                  | Yes              | Yes                 | Yes                                   | Yes               | Yes                | Yes                | Yes                | Yes                                       | Yes                        | Yes                              | Yes                 | Yes            | Yes            |
| 6. Assess content validity.                                                                                                       | Yes                      | Yes                                           | Yes              | Yes                                                   | Yes                  | Yes                                          | Yes                          | Yes                  | Yes              | Yes                 | Yes                                   | Yes               | Yes                | Yes                | Yes                | Yes                                       | Yes                        | Yes                              | Yes                 | Yes            | Yes            |
| 7. Assess internal structure.                                                                                                     | Yes                      | No                                            | Yes              | Yes                                                   | Yes                  | Yes                                          | Yes                          | Yes                  | Yes              | Yes                 | No                                    | No                | Yes                | No                 | Yes                | Yes                                       | Yes                        | No                               | No                  | Yes            | Yes            |
| 8. Assess reliability and measurement error                                                                                       | Yes                      | Yes                                           | No               | Yes                                                   | Yes                  | Yes                                          | Yes                          | Yes                  | Yes              | Yes                 | Yes                                   | Yes               | Yes                | Yes                | Yes                | Yes                                       | Yes                        | No                               | No                  | Yes            | Yes            |
| 9. Assess other measurement properties (criterion                                                                                 | Yes                      | Yes                                           | No               | No                                                    | Yes                  | No                                           | No                           | Yes                  | Yes              | Yes                 | Yes                                   | No                | No                 | No                 | Yes                | No                                        | No                         | No                               | Yes                 | Yes            | Yes            |

|                                                                        |              |     |      |               |      |      |      |      |                     |                     |      |      |     |      |      |                     |      |      |      |                     |                     |
|------------------------------------------------------------------------|--------------|-----|------|---------------|------|------|------|------|---------------------|---------------------|------|------|-----|------|------|---------------------|------|------|------|---------------------|---------------------|
| validity, hypothesis testing for construct validity, and sensitivity). |              |     |      |               |      |      |      |      |                     |                     |      |      |     |      |      |                     |      |      |      |                     |                     |
| 10. Formulate recommendations.                                         | Yes          | Yes | Yes  | No            | Yes  | Yes  | No   | No   | No                  | Yes                 | No   | No   | Yes | Yes  | Yes  | Yes                 | Yes  | Yes  | No   | No                  | No                  |
| 11. Select a systematic review.                                        | Yes          | Yes | Yes  | No            | Yes  | Yes  | No   | No   | No                  | Yes                 | No   | No   | Yes | Yes  | Yes  | Yes                 | Yes  | Yes  | No   | No                  | No                  |
| Internal consistency                                                   | 0.85<br>0.88 | Yes | 0.80 | 0.75 AND 0.93 | 0.76 | 0.89 | 0.74 | 0.80 | 0.95<br>AND<br>0.97 | 0.77<br>AND<br>0.84 | 0.83 | 0.92 | Yes | 0.94 | 0.90 | 0.79<br>AND<br>0.89 | 0.94 | 0.92 | 0.70 | 0.86<br>AND<br>0.93 | 0.75<br>AND<br>0.86 |

**RSES:** Rosenberg Self-Esteem Scale.

**GHQ:** General Health Questionnaire.

**BSQ:** Body Shape Questionnaire.

**CAF (Spanish acronym):** Physical Self-Concept Questionnaire.

**CAPA:** Children’s Attraction to Physical Activity Questionnaire.

**HPLP II (1987):** Health Promoting Lifestyle Profile (Walker, Sechrist, and Pender, 1987).

**ACS:** Adolescent Coping Scale.

**SOC-13:** Sense of Coherence Scale.

**PAQ-A:** Physical Activity Questionnaire for Adolescents.

**MIFA (Spanish acronym):** Measurement of the Intention to be Physically Active.

**HBSC:** Health Behaviour in School-aged Children.

**HPLP II (1996):** Health Promoting Lifestyle Profile (Walker and Hill Polerecky, 1996).
